# Supplementary material
Source: publisher figshare collection journal article supplement (https://gsajournals.figshare.com/ndownloader/files/26470685)
Supplement: Supplementary file 1 [file 26470685]

| **Table S2 Primers used in this study for quantitative real-time PCR or sequencing.** | | | |
| --- | --- | --- | --- |
| **lncRNAs ID** | **Forward primer: 5′-3′** | **Reverse primer: 5′-3′** | **Description** |
| Actin | CTGAGAATAAAACGTGGACGGTG | TCCATATCATCAGCATCGTTACAAC | reference gene |
| TCONS_00019273 | TGATCGGAGCGTTGTCTTTAG | GGAGTGTCAGCCACCATTTA | common lincRNA |
| TCONS_00001000 | CCGAAGACGACGGTGAAC | ACAGATCCAAACACATCACAAATC | common lincRNA |
| TCONS_00023059 | GGGAAATGAGCCTCACAGATAG | GTAGCTAGAGCAGAAGGAGAGA | common lincRNA |
| TCONS_00067355 | CGGCTGCCTACCATATCTTATC | AGGGAAAGAGGAGGAGGATT | common lincRNA |
| TCONS_00145128 | GGCCAGTGTTTGTCCATAGT | CTTCGTCATCTTCTCCGTTCTT | common lincRNA |
| TCONS_00149981 | GGCTCGGGTAGACATGATAGA | CCGGTTGGGAAGTAGCAATAG | common lincRNA |
| TCONS_00185337 | CTGTGGCATATATACTCCTCCTG | ACCACTGAATCAATCATGCAAA | common lincRNA |
| TCONS_00256742 | CCCTGTTGTGGCTCAATAAGTA | CCACTGAGTCAATCATGCAAAT | common lincRNA |
| TCONS_00259801 | ACACCAACCGGAACTCTTTAG | CGGTTTGTAACCCTCTGTAGTC | common lincRNA |
| TCONS_00282194 | ATGTGAGTTAGAACCAGCCTTC | AAAGGAGGGACGTTCCAAAG | common lincRNA |
| TCONS_00046335 | GCCGCCTGCATACACTAAA | CTGACTCAACTCTGGTGTCATT | common lncNAT |
| TCONS_00072134 | CCCAGTAACAAGGGAGCAAA | GCCGAGGAGGAGGAATAAATG | common lncNAT |
| TCONS_00080895 | CAACAAGTCGAACCCAATGAAC | CCGGAACTCTAGAAATCGTGAA | common lncNAT |
| TCONS_00087080 | TCACCGGGATTTATTCCCAAAT | TGAGATACACAAAGCCACCTAAG | common lncNAT |
| TCONS_00092327 | GATGCAAGCTGGACCAAGTA | GCCATCTGTTTGAAGTTTCTTCTG | common lncNAT |
| TCONS_00030280 | TTGCAATCACCCTAGAAACTAATTG | ATGATGGAGTAAGAAGGGCAAA | common lncNAT |
| TCONS_00123519 | CCGTAGGTACGGCCATTATT | ACATTGCTCATCTGCCATTTAG | common lncNAT |
| TCONS_00178727 | CGACTGAACAATCTCAGCAAAC | GTGGAAAGTTCTTGTGGACTACTA | common lncNAT |
| TCONS_00254395 | GCACAAGAAGAGGTAGGAGAAG | GCATGAGTGGAGACGATCAA | common lncNAT |
| TCONS_00301352 | AGCACTATGGCACAAGAACTAC | CAATGTGCCATCAGCGAAAC | common lncNAT |
